# Supplementary figures and images for: Genome Assembly of a Relict Arabian Species of Daphnia O. F. Müller (Crustacea: Cladocera) Adapted to the Desert Life
Source: MDPI journal article supplement (doi:10.3390/ijms24010889), 2023-01-03

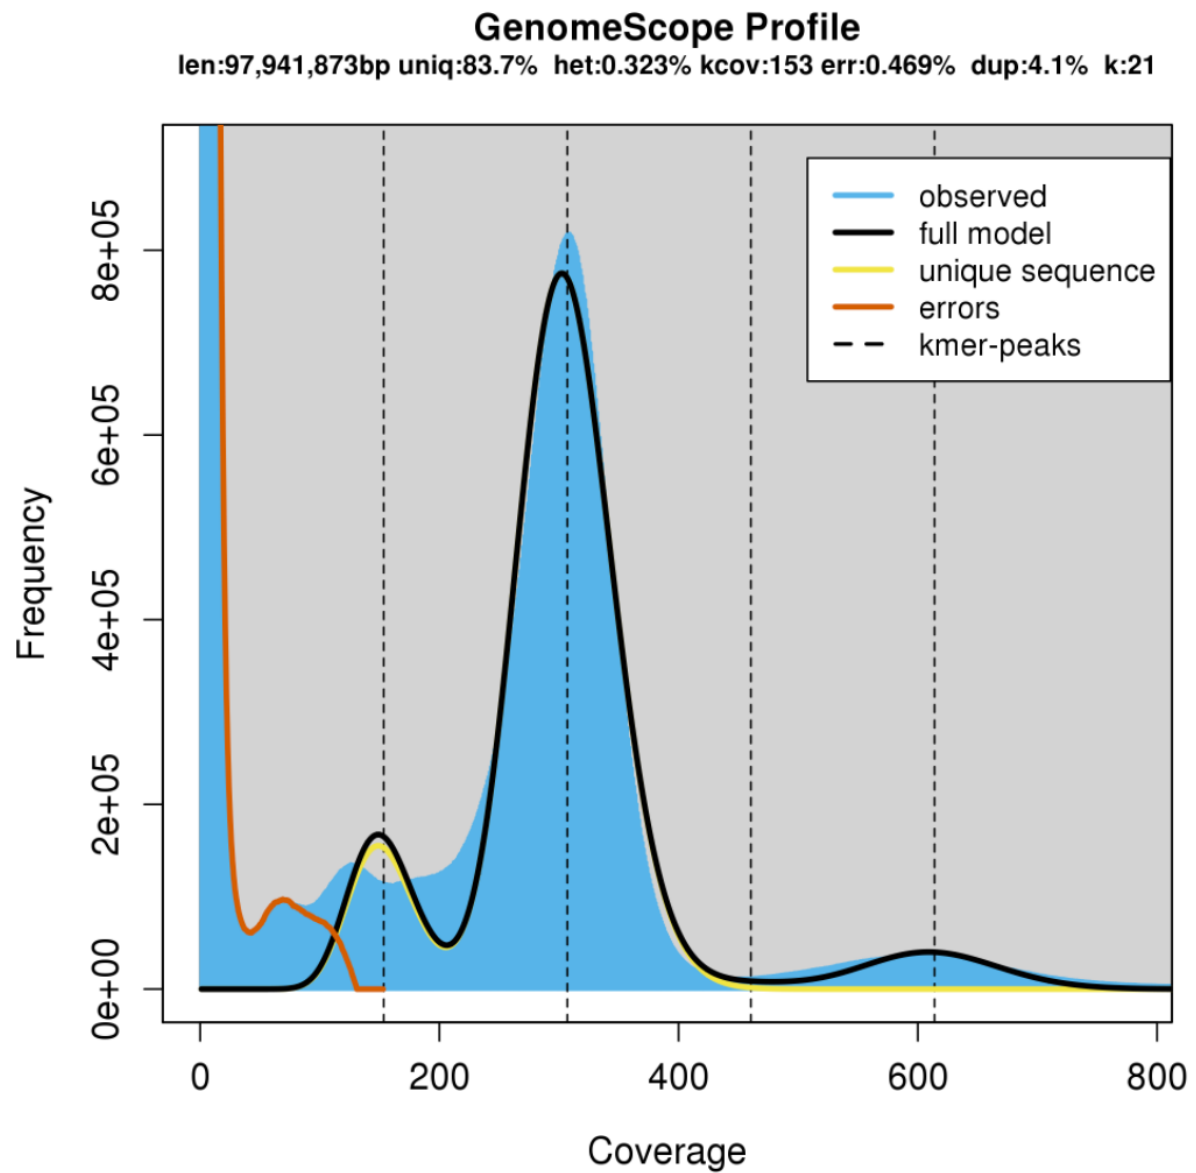

Figure S1. *D. arabica* k-mer (21-mer) based genome size estimation

Supplement: s1 [file s1]
